# Supplementary material for: Revealing Genome-Based Biosynthetic Potential of Streptomyces sp. BR123 Isolated from Sunflower Rhizosphere with Broad Spectrum Antimicrobial Activity
Source: MDPI journal article supplement (doi:10.3390/antibiotics11081057), 2022-08-04
Supplement: s1 [file s1]

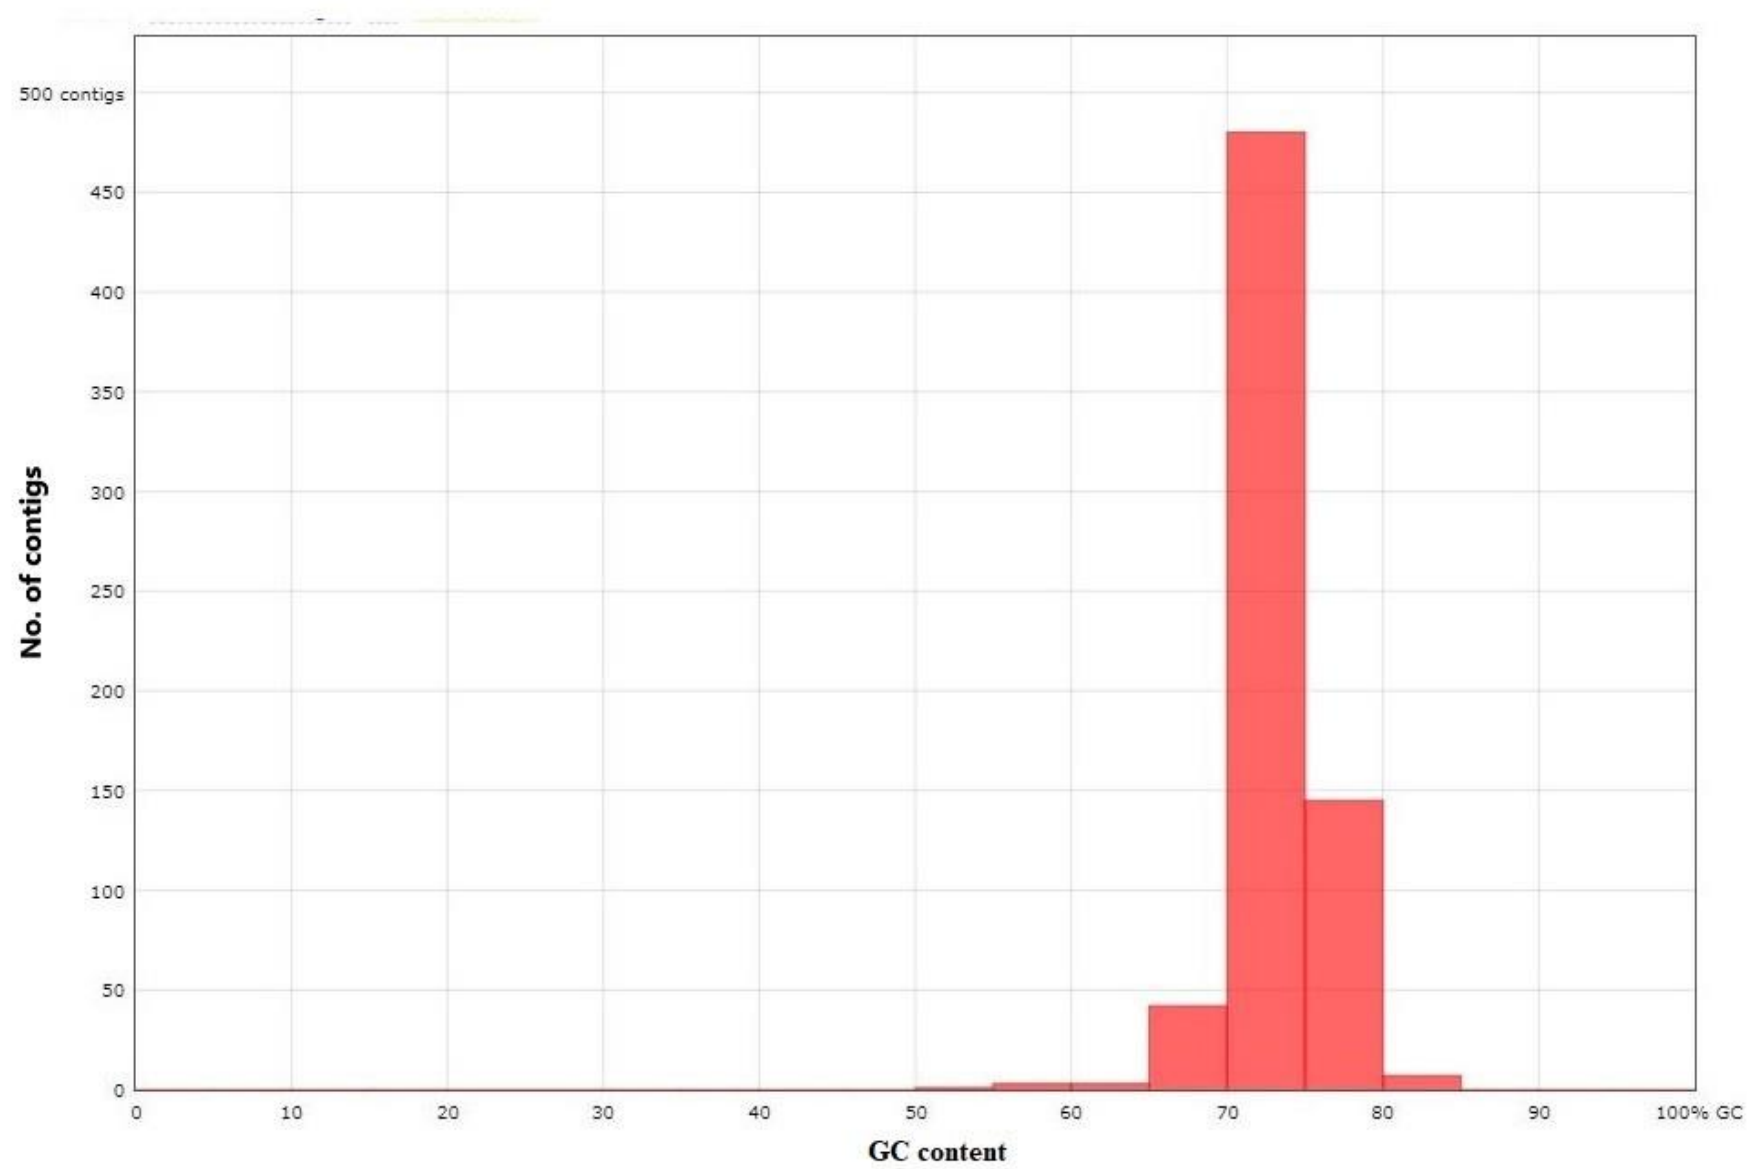

Figure S1. Plot representing number of contigs of the *Streptomyces* sp. BR123 genome with GC percentage in certain range

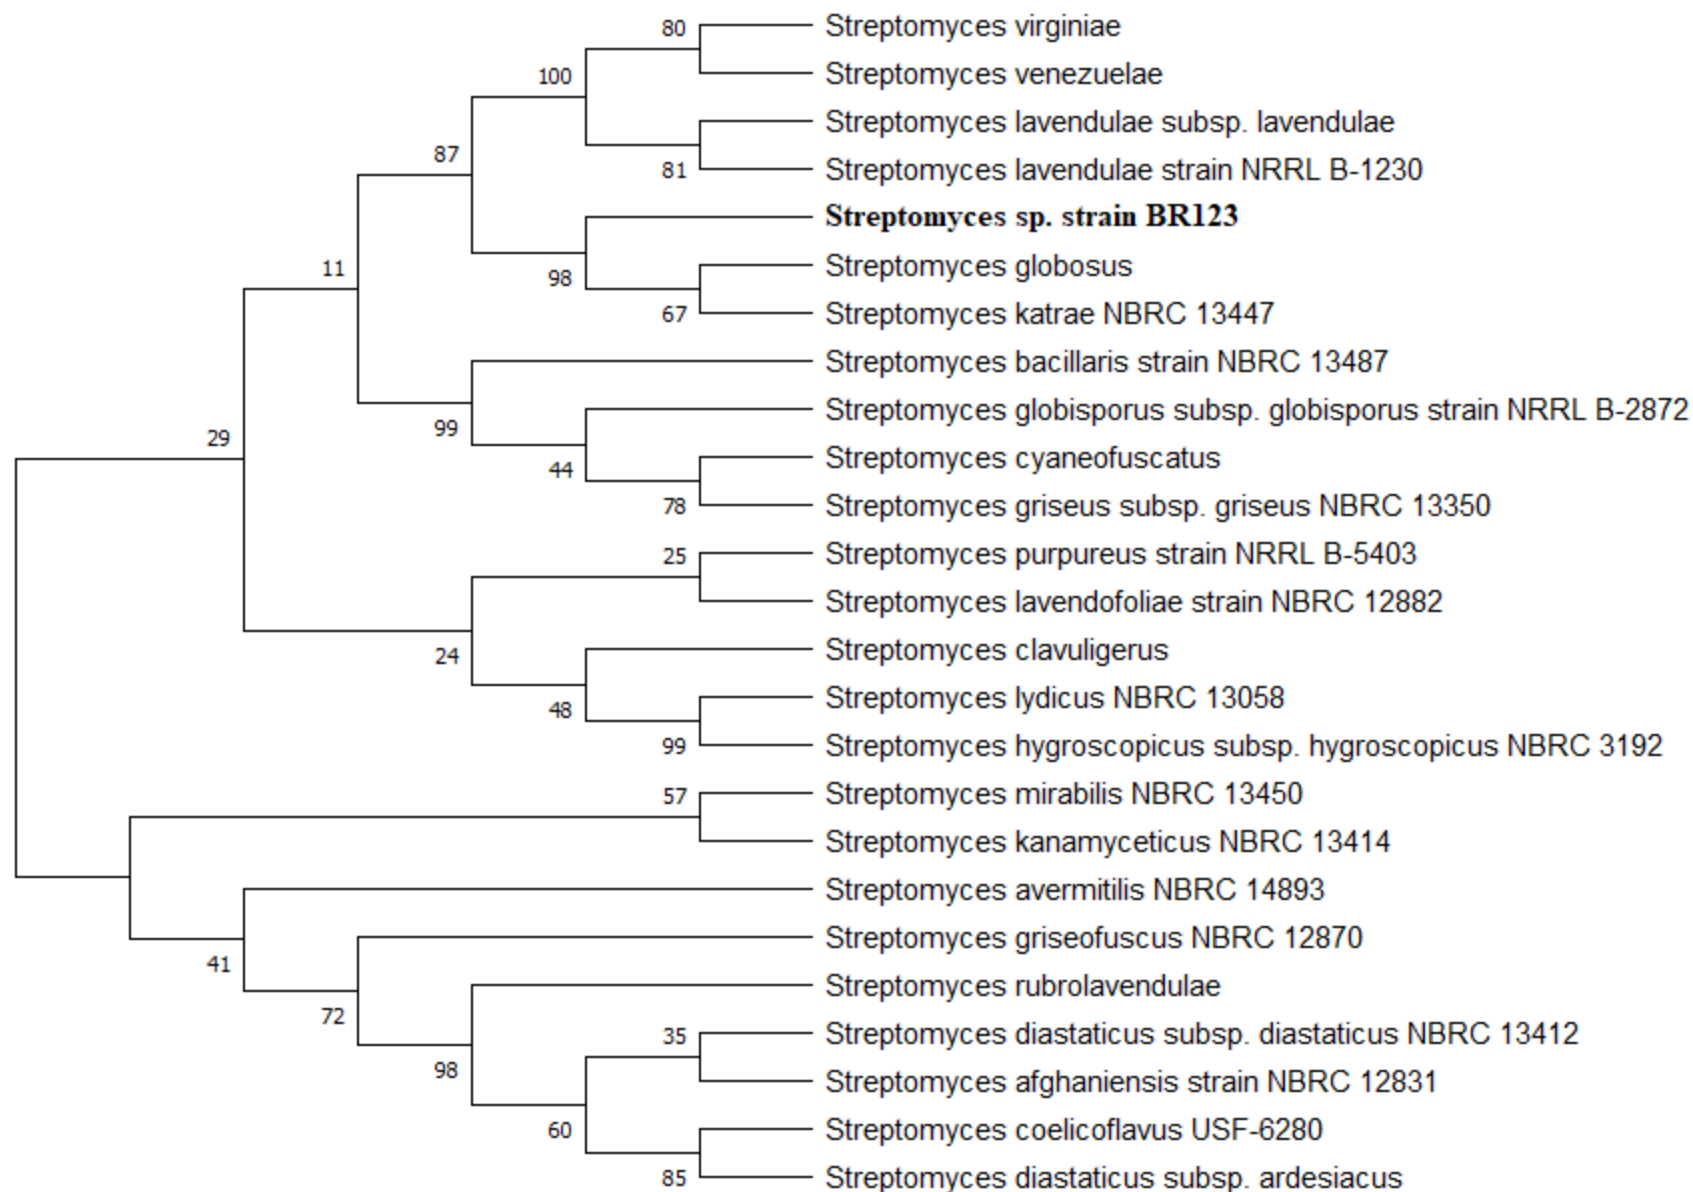

Figure S2. Phylogenetic tree of *Streptomyces* isolate BR123 and other *Streptomyces* based on 16S rRNA sequences

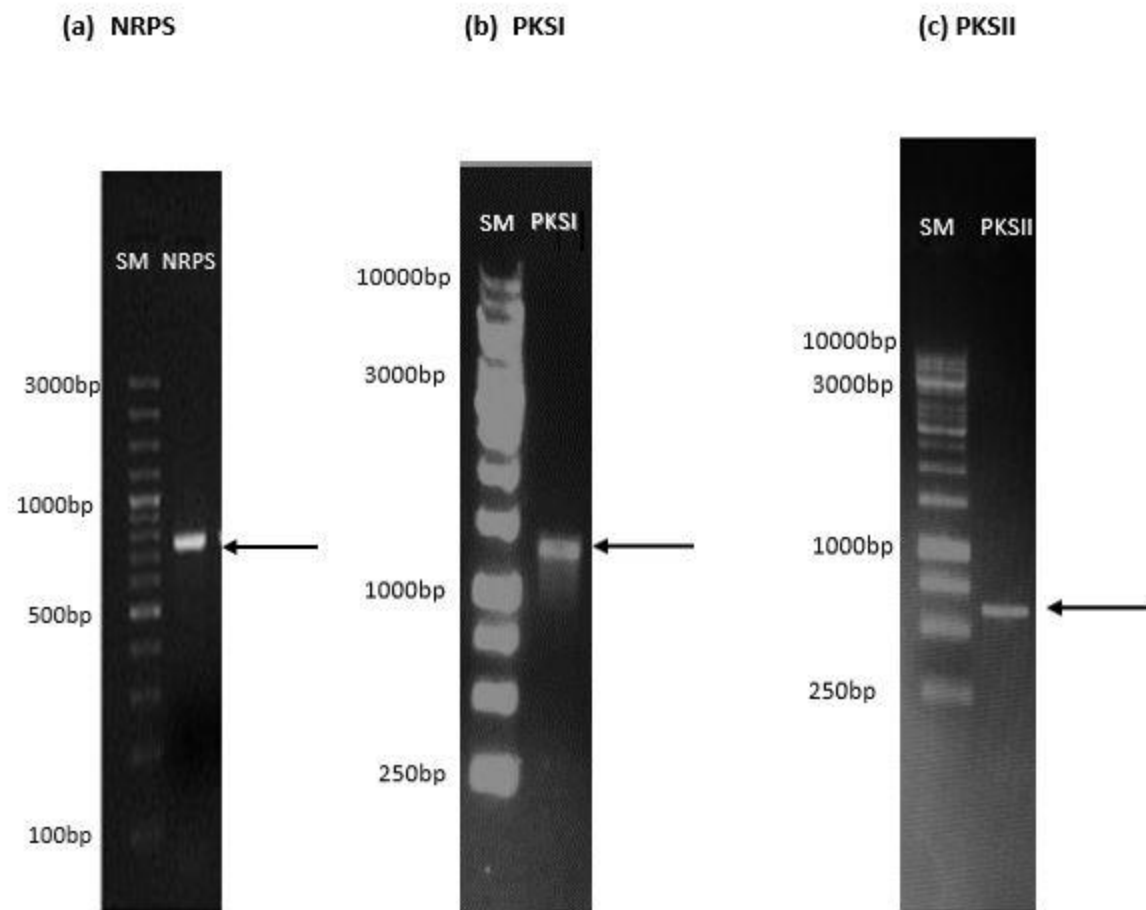

Figure S3. PCR-based identification of NRPS and PKS genes in isolate BR123.cite (a) NRPS (b) PKS 1 (c) PKS 2

File S1. Biosynthetic gene clusters predicted by antiSMASH cite and their core structures.

(a) Cluster 59: Lanthipeptide class-ii

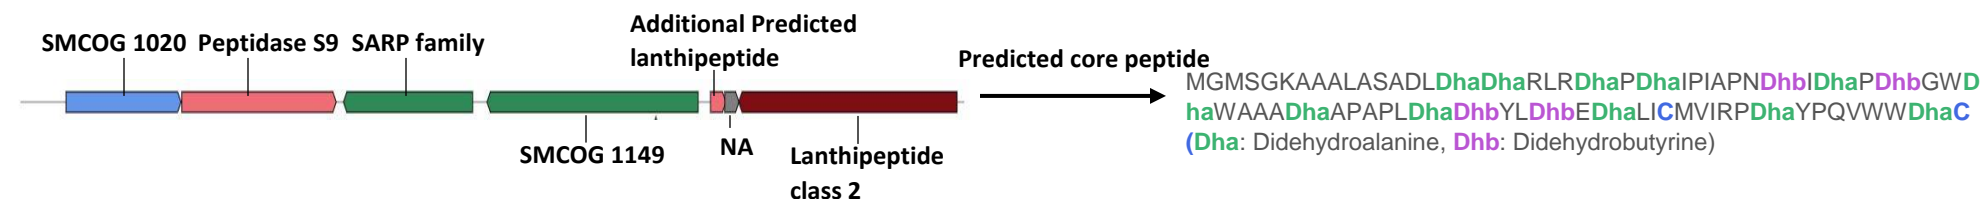

(b) Cluster 2: T1PKS

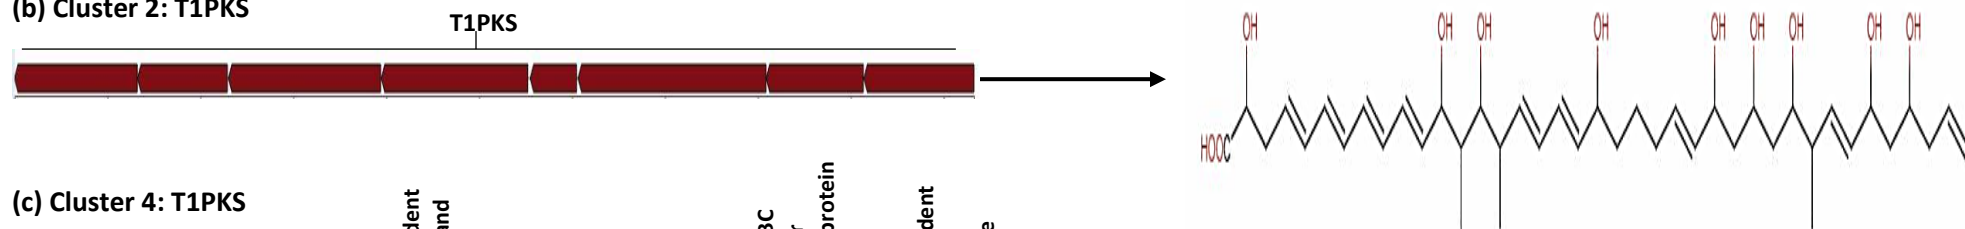

(c) Cluster 4: T1PKS

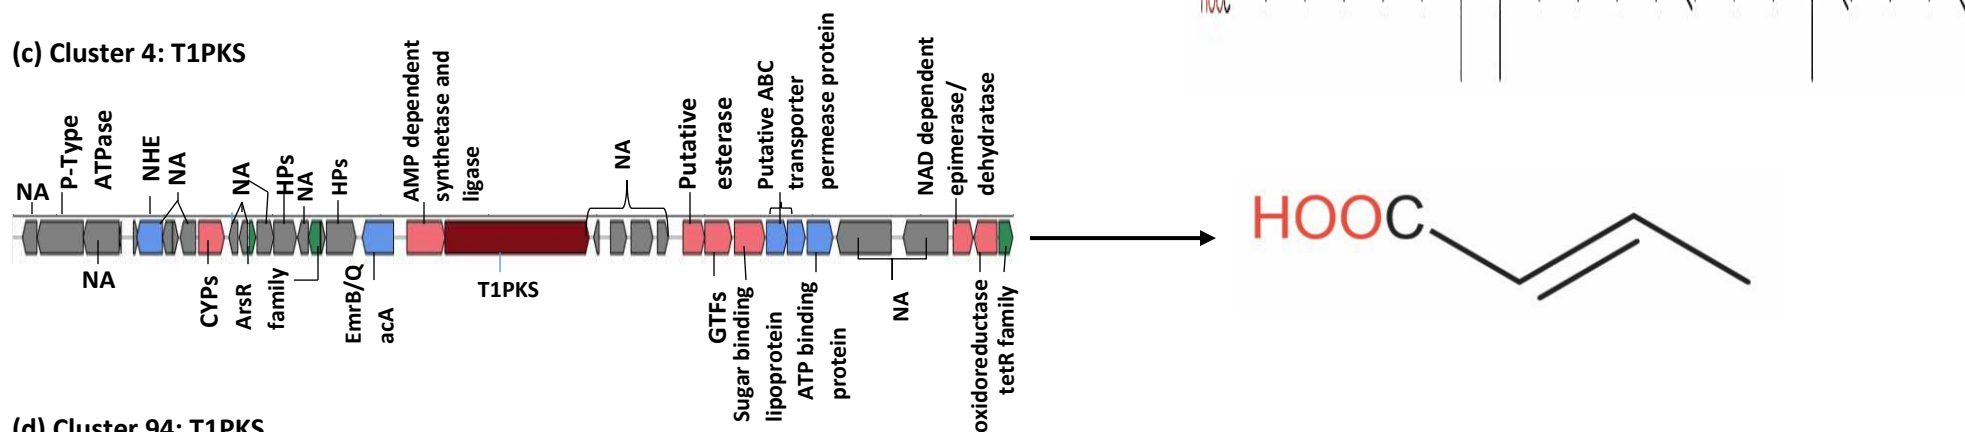

(d) Cluster 94: T1PKS

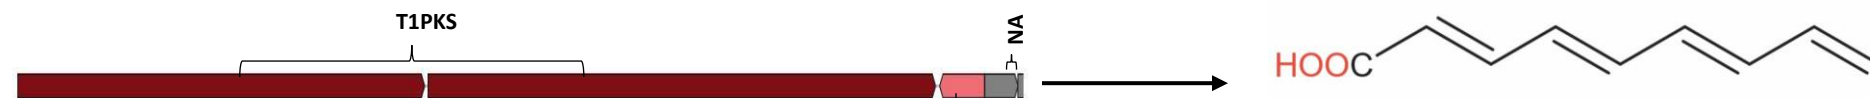

(e) Cluster 320 and 350: T1PKS

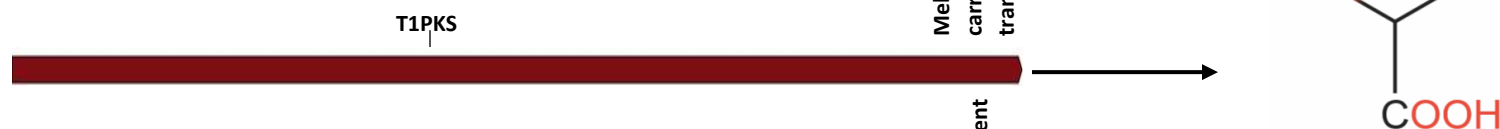

(f) Cluster 104: NRPS

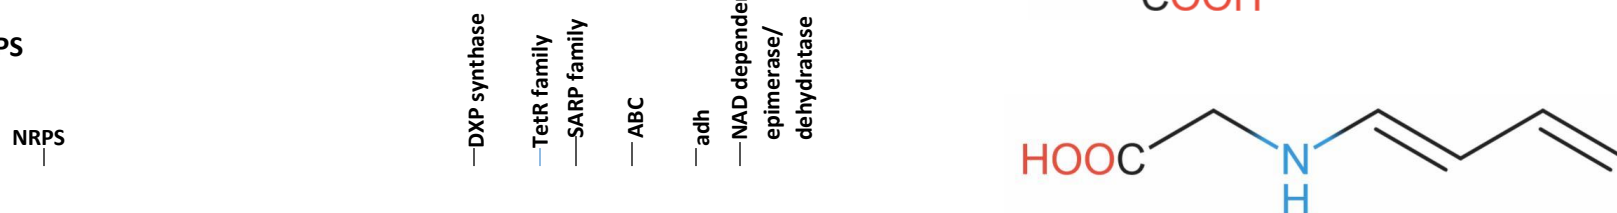

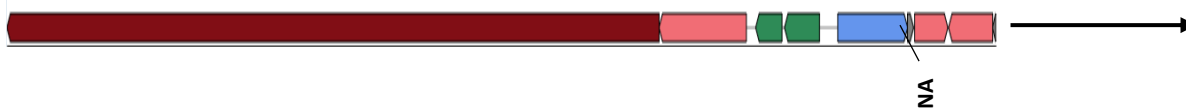

(g) Cluster 239: NRPS

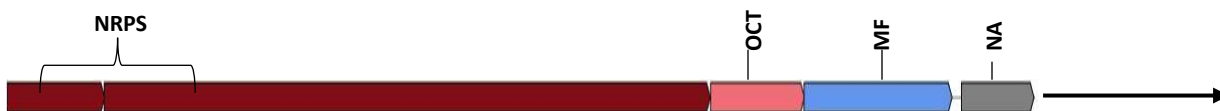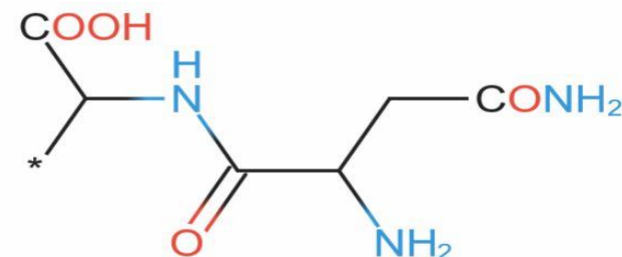

(h) Cluster 271: NRPS

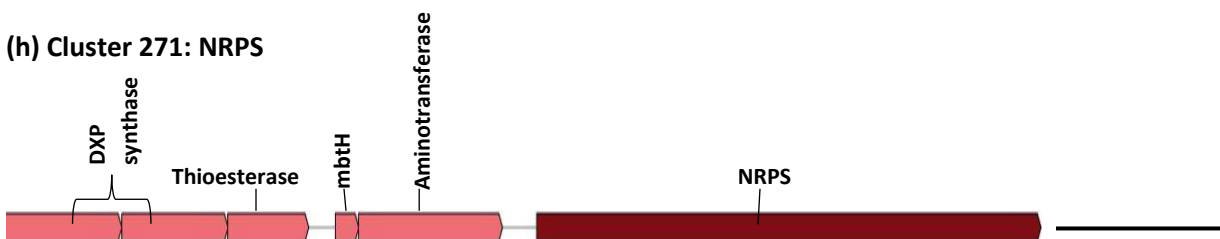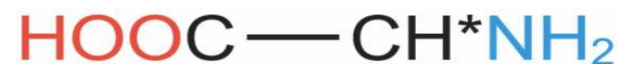

(i) Cluster 401: NRPS

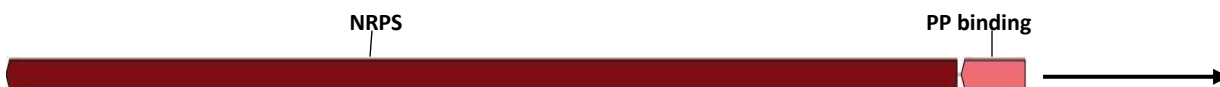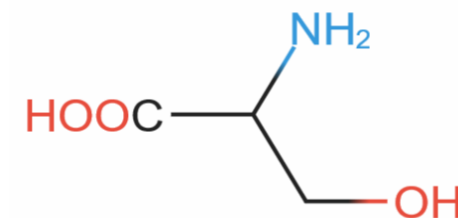

(j) Cluster 221: NRPS like

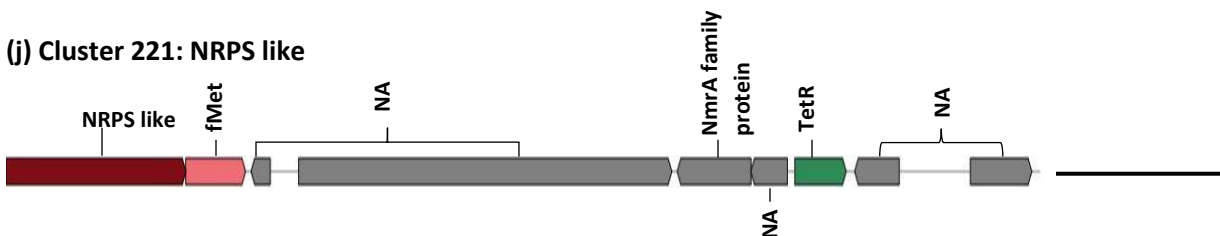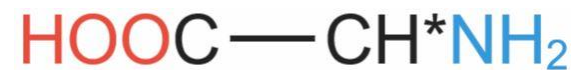

(k) Cluster 29: Hybrid (lanthipeptide-class-3, NRPS)

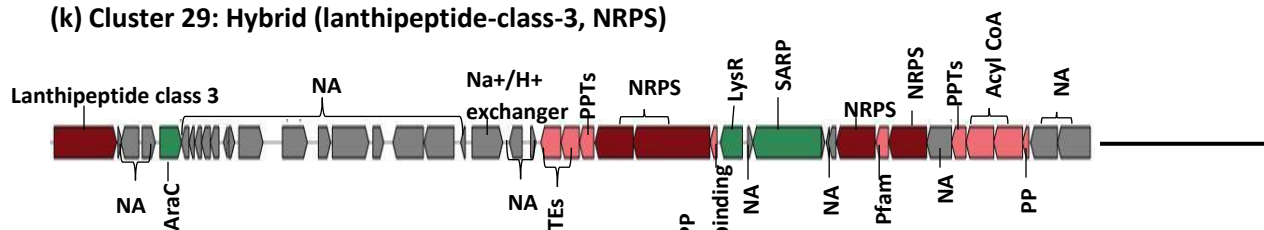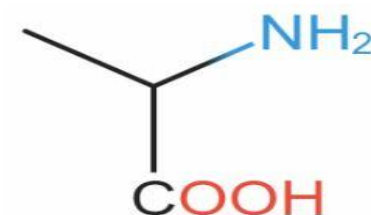

(l) Cluster 46: Hybrid (NRPS, transAT-PKS)

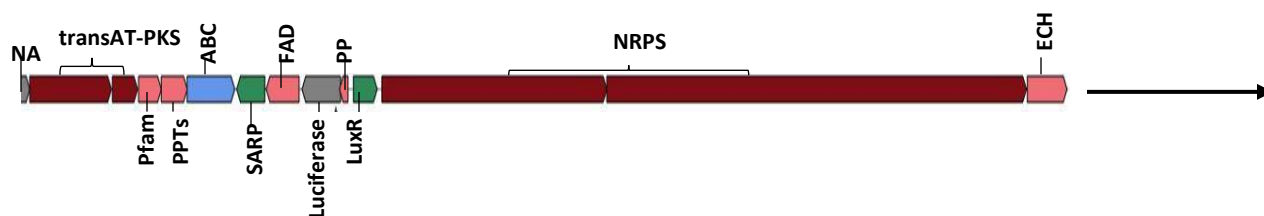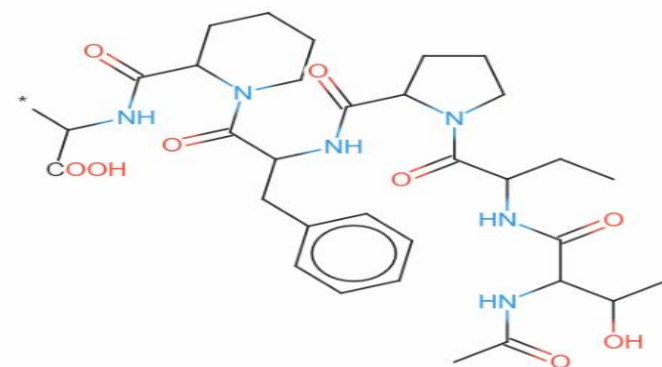

(m) Cluster 62: Hybrid (T1PKS, NRPS like)

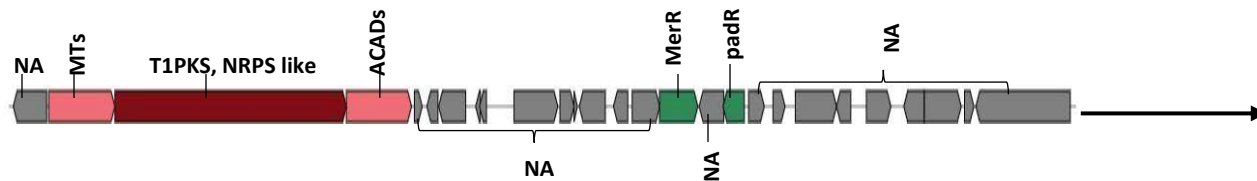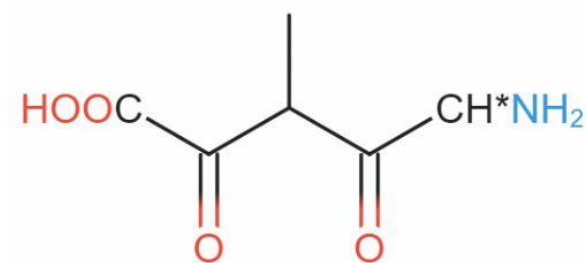

(n) Cluster 149: Hybrid (T1PKS, NAPAA)

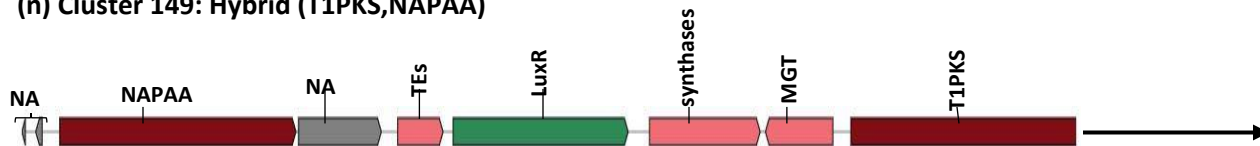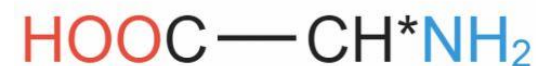

(o) Cluster 243: PKS like

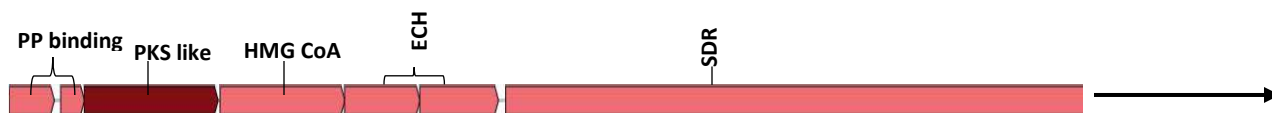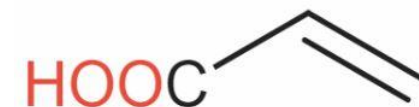

**Table S1. Antimicrobial activity of *Streptomyces* strain BR123 in different growth media**

| Test organisms                | Culture Medium*(Zone of inhibition in mm) |           |           |      |           |           |           |
|-------------------------------|-------------------------------------------|-----------|-----------|------|-----------|-----------|-----------|
|                               | ISP1                                      | ISP2      | ISP3      | ISP4 | ISP5      | SCA       | CSPY-ME   |
| <b>Gram-positive bacteria</b> |                                           |           |           |      |           |           |           |
| <i>Staphylococcus aureus</i>  | -                                         | -         | -         | -    | 13.2±0.19 | -         | 16.4±0.09 |
| <i>Bacillus subtilis</i>      | -                                         | -         | -         | -    | -         | -         | 24.1±0.12 |
| <b>Gram-negative bacteria</b> |                                           |           |           |      |           |           |           |
| <i>Salmonella typhi</i>       | -                                         | -         | -         | -    | -         | -         | 11.6±0.11 |
| <i>Xanthomonas oryzae</i>     | -                                         | 21.7±0.11 | -         | -    | -         | -         | 18.4±0.02 |
| <i>Escherichia coli</i>       | -                                         | 12.4±0.23 | -         | -    | 20.3±0.08 | 16.6±0.18 | 23.5±0.10 |
| <i>Pseudomonas aeruginosa</i> | -                                         | -         | -         | -    | -         | -         | 8.9±0.14  |
| <b>Fungus</b>                 |                                           |           |           |      |           |           |           |
| <i>Aspergillus niger</i>      | -                                         | 18.2±0.12 | 13.4±0.05 | -    | 10.9±0.24 | -         | 20.2±0.08 |
| <i>Aspergillus flavus</i>     | -                                         | 14.3±0.33 | -         | -    | 12.5±0.17 | -         | -         |
| <i>Fusarium oxysporum</i>     | -                                         | -         | -         | -    | -         | -         | -         |
| <i>Fusarium solani</i>        | -                                         | 17.5±0.25 | -         | -    | 15.1±0.07 | -         | 18.7±0.21 |

\*ISP (International *Streptomyces* project) medium including; ISP1, trypton yeast extract agar (276910/ BD Difco/ fisher scientific, USA); ISP2, Yeast extract malt extract agar (277010/ BD Difco/ fisher scientific, USA); 2; ISP3, Oat meal agar (O 3506/SIGMA, USA); ISP4, inorganic salt starch agar (277210/ BD Difco/ fisher scientific, USA); ISP5, glycerol asparagine agar (G9788/SIGMA-ALDRICH, USA);

SCA, starch casein agar (Section Materials and Methods);

CSPY-ME, casein-starch-peptone-yeast extract-malt extract agar (Section Materials and Methods)
